# Supplementary material for: Chronic Ouabain Prevents Na,K-ATPase Dysfunction and Targets AMPK and IL-6 in Disused Rat Soleus Muscle
Source: PubMed Central journal article supplement (PMC8069997; doi:10.3390/ijms22083920), 2021-04-10

Figure S1. Original Images for Figure 6.

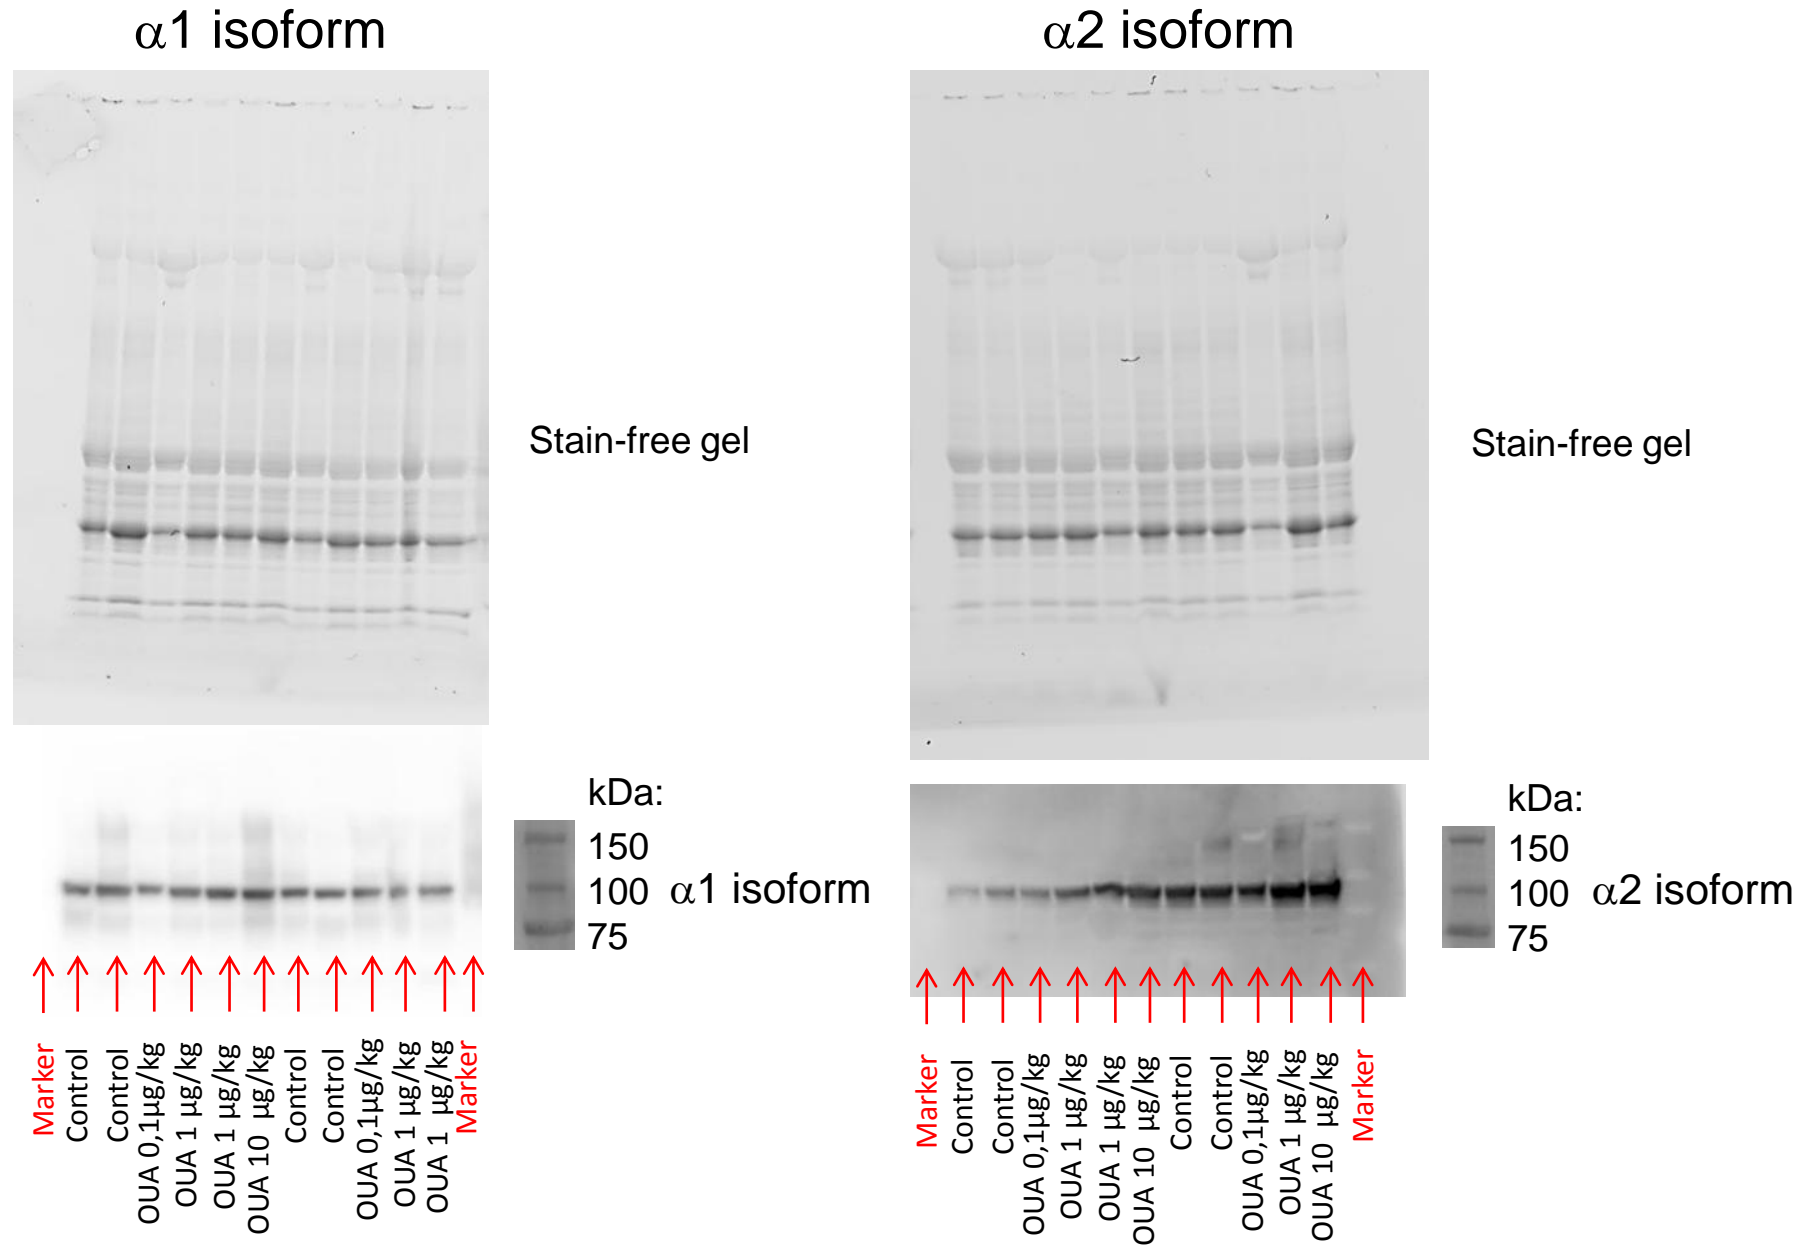

Figure S2. Original Images for Figure 7.

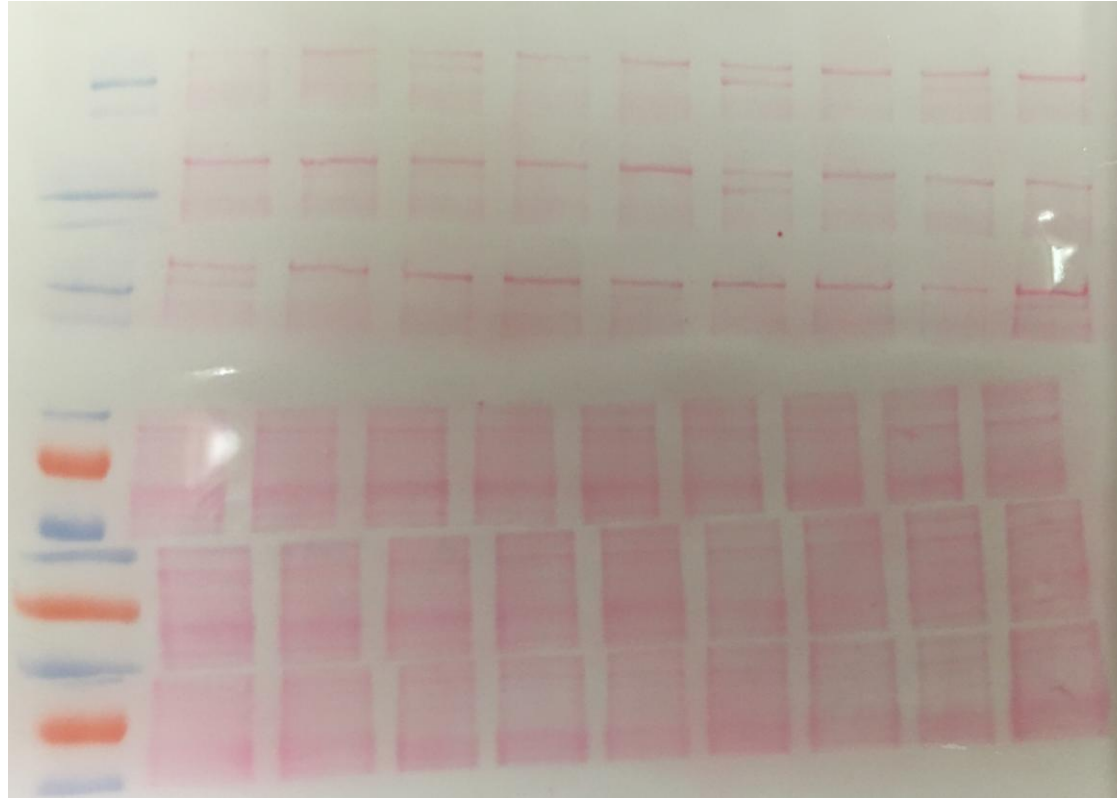

Ponceau  
ACC

Ponceau  
AMPK

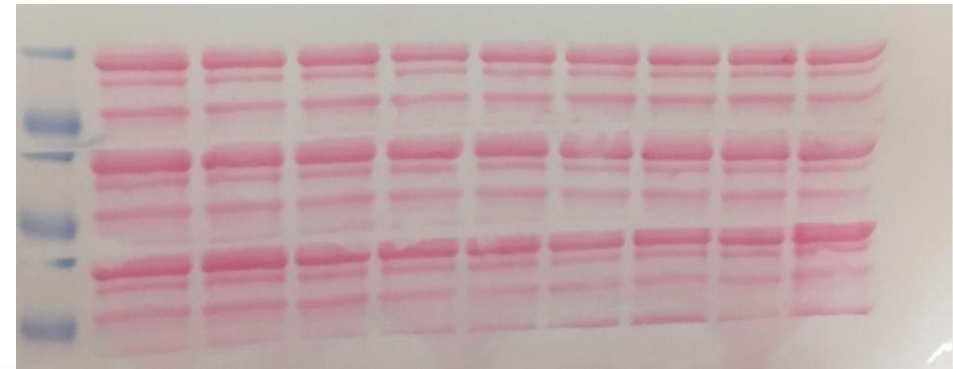

Ponceau  
GAPDH

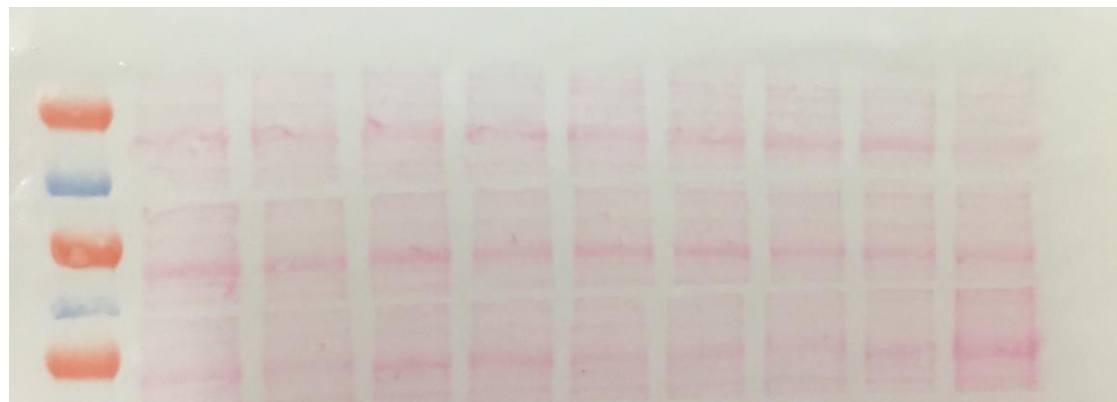

Ponceau  
p-70

# phospho-AMPK (Thr 172)

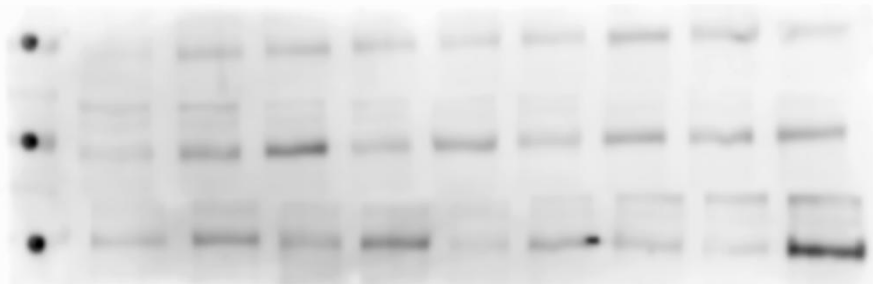

# total AMPK

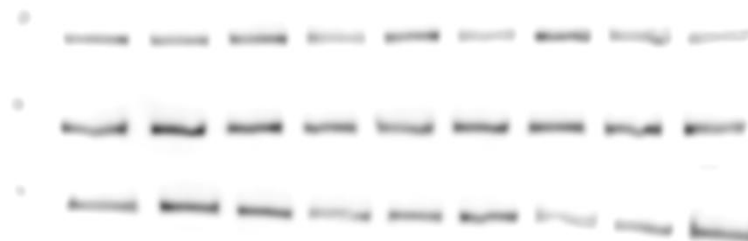

70 kDa  
phospho-pAMPK  
western blot

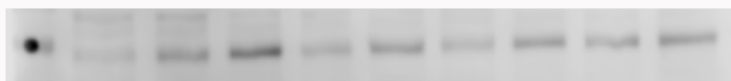

↑  
M  
a  
r  
k  
e  
r

↑  
V  
e  
h  
i  
c  
l  
e  
+  
H  
S  
2  
O  
μ  
g

↑  
O  
U  
A  
2  
0  
μ  
g

↑  
O  
U  
A  
+  
H  
S  
2  
O

↑  
C  
o  
n  
t  
r  
o  
l  
2  
0  
μ  
g

↑  
V  
e  
h  
i  
c  
l  
e  
+  
H  
S  
2  
O  
μ  
g

↑  
O  
U  
A  
2  
0  
μ  
g

↑  
O  
U  
A  
+  
H  
S  
2  
O  
μ  
g

↑  
C  
o  
n  
t  
r  
o  
l  
2  
0  
μ  
g

↑  
V  
e  
h  
i  
c  
l  
e  
+  
H  
S  
2  
O  
μ  
g

70 kDa  
total-AMPK  
western blot

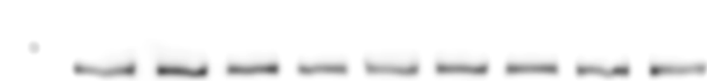

↑  
M  
a  
r  
k  
e  
r

↑  
V  
e  
h  
i  
c  
l  
e  
+  
H  
S  
2  
O  
μ  
g

↑  
O  
U  
A  
2  
0  
μ  
g

↑  
O  
U  
A  
+  
H  
S  
2  
O

↑  
C  
o  
n  
t  
r  
o  
l  
2  
0  
μ  
g

↑  
V  
e  
h  
i  
c  
l  
e  
+  
H  
S  
2  
O  
μ  
g

↑  
O  
U  
A  
2  
0  
μ  
g

↑  
O  
U  
A  
+  
H  
S  
2  
O  
μ  
g

↑  
C  
o  
n  
t  
r  
o  
l  
2  
0  
μ  
g

↑  
V  
e  
h  
i  
c  
l  
e  
+  
H  
S  
2  
O  
μ  
g

# phospho ACC (Ser 79)

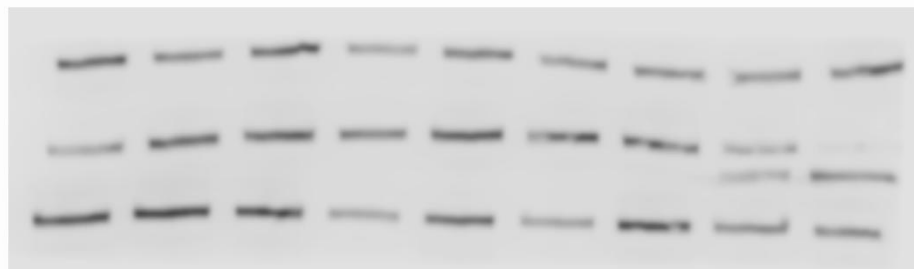

# total ACC

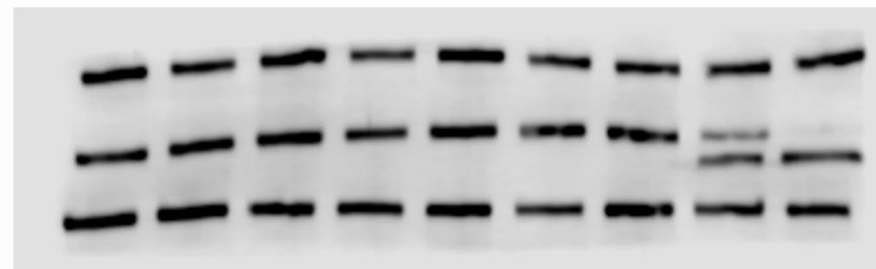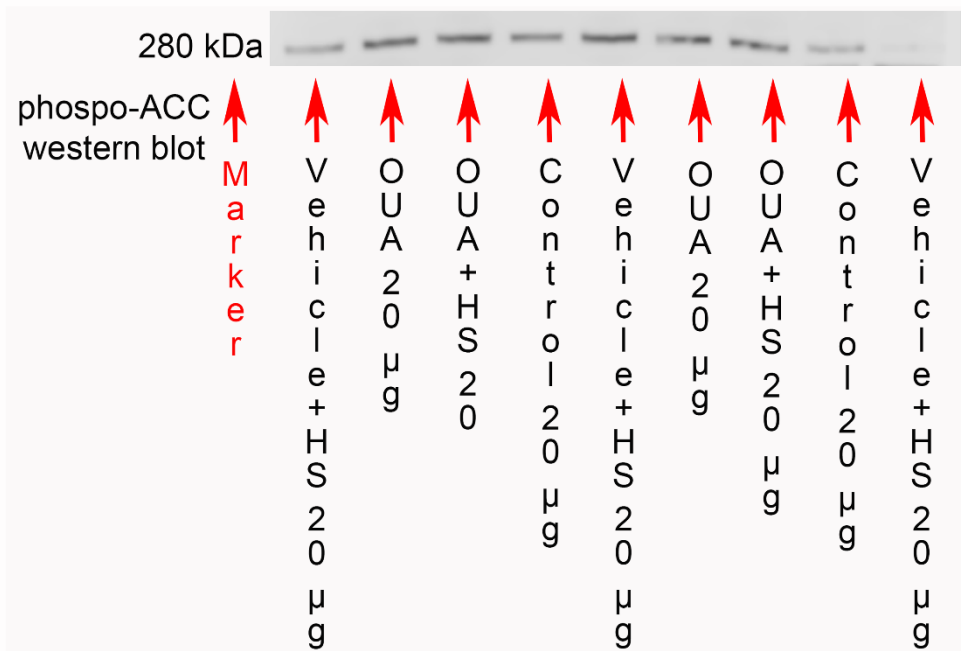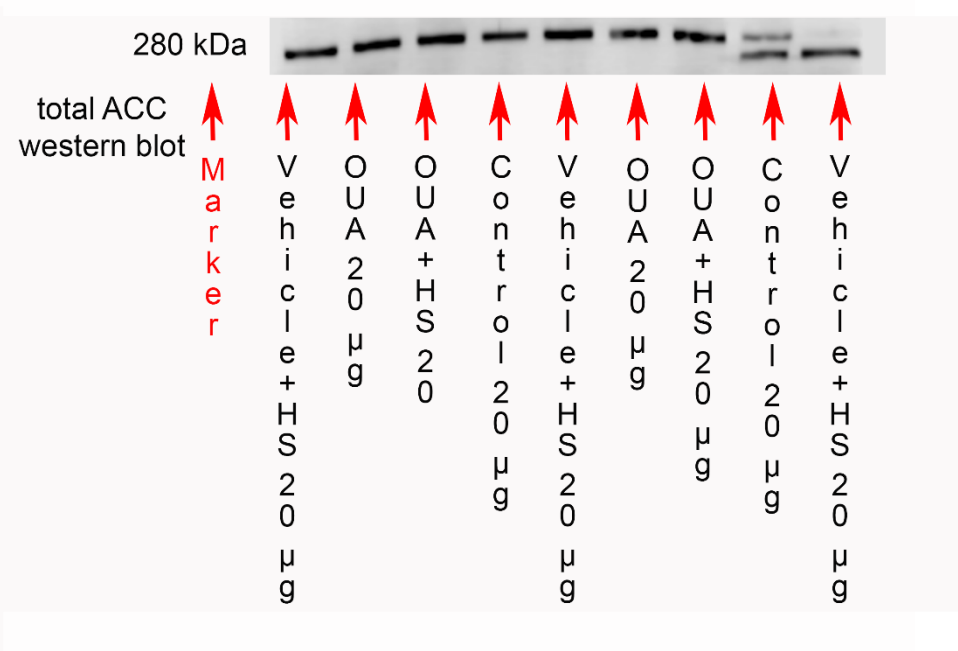

phospho-p70  
(T389)

Western blot

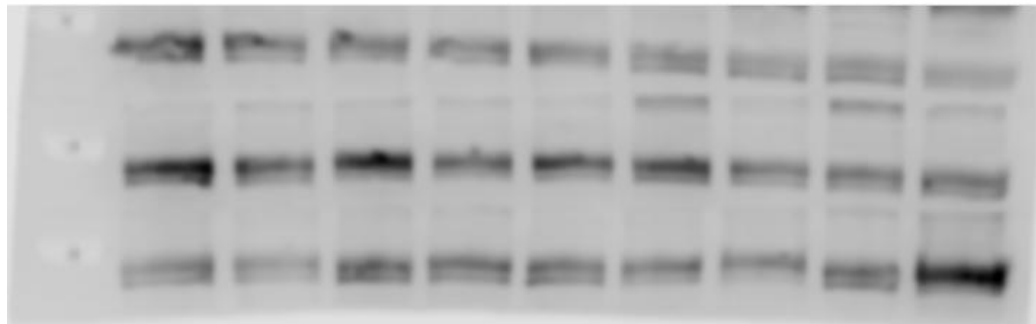

total p70

Western blot

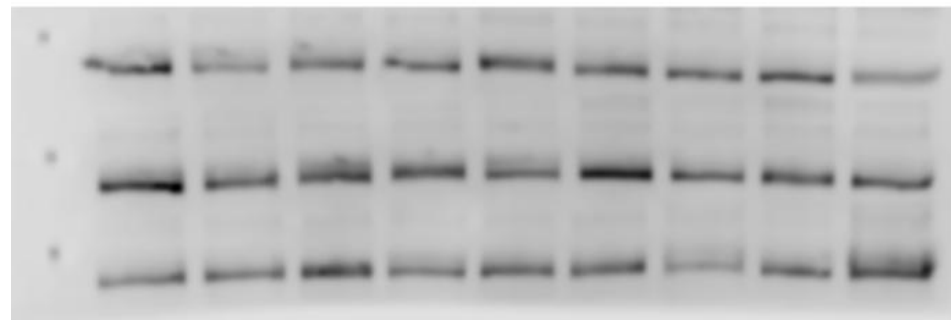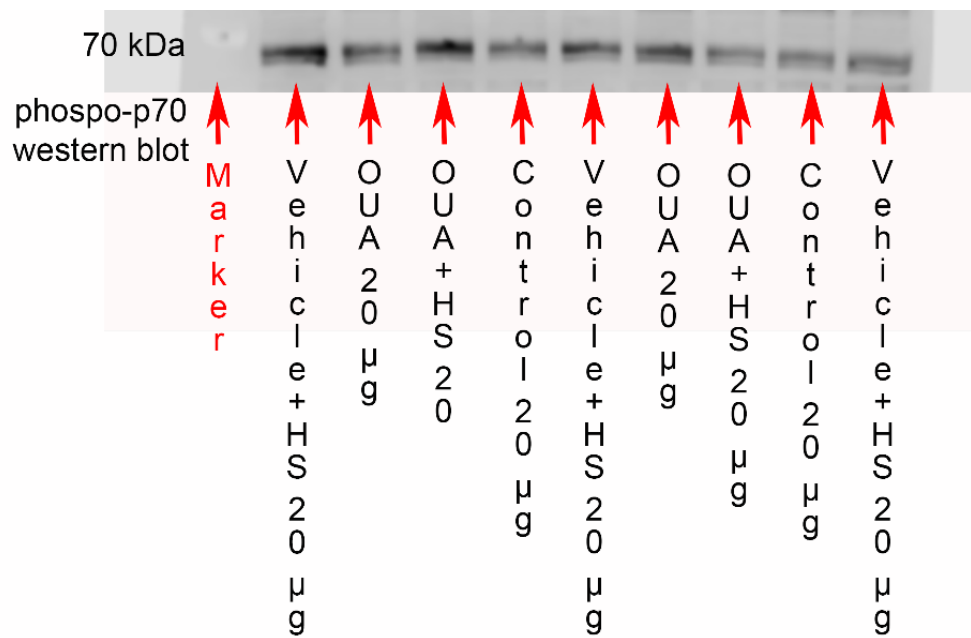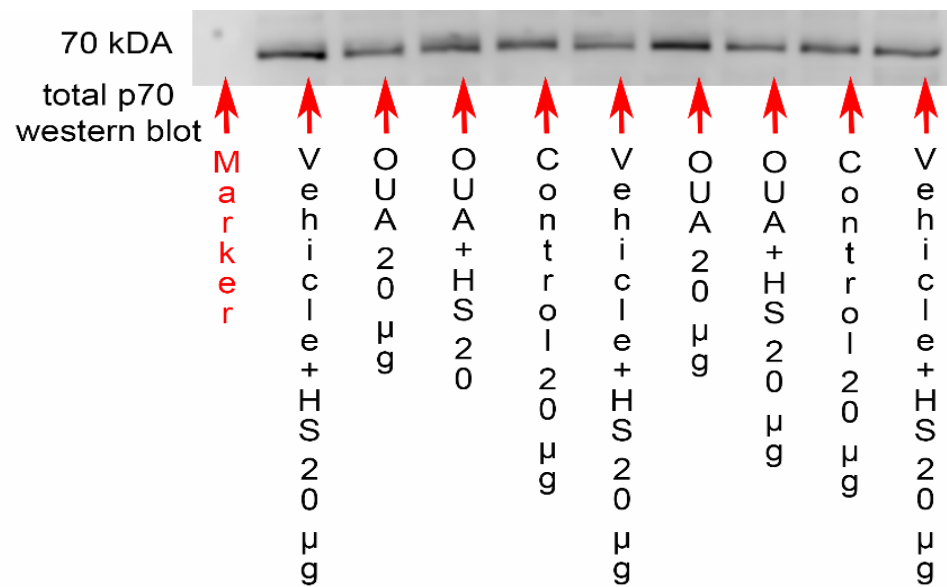

Supplement: ijms-22-03920-s001.pdf [file ijms-22-03920-s001.pdf]
